# Supplementary material for: Dietary Knowledge, Dietary Adherence, and BMI of Lebanese Adolescents and Their Parents
Source: Nutrients. 2020 Aug 11;12(8):2398. doi: 10.3390/nu12082398 (PMC7468749; doi:10.3390/nu12082398)
Supplement: Supplementary file 1 [file nutrients-12-02398-s001.xlsx]

## Sheet: Table S1
Table S1 – Responses to the Dietary Knowledge Questionnaire by the adolescents and their parents
	Adolescents n (%)		Parents n (%)
	False/ Do not know	Correct answers	False/ Do not know	Correct answers
Recommended number of fruit and vegetable servings per day	1402 (91.3)	133 (8.7)	271 (85.5)	46 (14.5)
Type of fat to cut down on	1005 (65.5)	530 (34.5)	79 (24.9)	238 (75.1)
Recommended type of dairy products	1105 (72.0)	430 (28.0)	173 (54.6)	144 (45.4)
Recommended daily water intake	679 (44.2)	856 (55.8)	91 (28.7)	226 (71.3)
Recommended duration of daily physical activity	743 (48.4)	792 (51.6)	132 (41.6)	185 (58.4)
Recommended intake of energy drinks per day	681 (44.4)	854 (55.6)	77 (24.3)	240 (75.7)
Do you think these are high or low in added sugar?
Apples	461 (30.0)	1074 (70.0)	80 (25.2)	237 (74.8)
Ice cream	380 (24.8)	1155 (75.2)	65 (20.5)	252 (79.5)
Commercial juices	173 (11.3)	1362 (88.7)	22 (6.9)	295 (93.1)
Soft drinks	238 (15.5)	1297 (84.5)	33 (10.4)	284 (89.6)
Grapes	626 (40.8)	909 (59.2)	130 (41.0)	187 (59.0)
Do you think these foods are high or low in fat?
Pasta	689 (44.9)	846 (55.1)	105 (33.1)	212 (66.9)
Beans	420 (27.4)	1115 (72.6)	54 (17.0)	263 (83.0)
Honey	1102 (71.8)	433 (28.2)	147 (46.4)	170 (53.6)
Nuts	728 (47.4)	807 (52.6)	100 (31.5)	217 (68.5)
Bread	976 (63.6)	559 (36.4)	171 (53.9)	146 (46.1)
Cheddar cheese	548 (35.7)	987 (64.3)	67 (21.1)	250 (78.9)
Chips	384 (25.0)	1151 (75.0)	52 (16.4)	265 (83.6)
Kashkawan cheese	513 (33.4)	1022 (66.6)	32 (10.1)	285 (89.9)
Mortadella	583 (38.0)	952 (62.0)	78 (24.6)	239 (75.4)
Do you think these are high or low in SFA?
Whole milk	1073 (69.9)	462 (30.1)	109 (34.4)	208 (65.6)
Olive oil	1192 (77.7)	343 (22.3)	111 (35.0)	206 (65.0)
Margarine	892 (58.1)	643 (41.9)	22 (6.9)	295 (93.1)
Chocolate cream	988 (64.4)	547 (35.6)	35 (11.0)	282 (89.0)
Do you think these are high or low in salt?
Sausage	849 (55.3)	686 (44.7)	93 (29.3)	224 (70.7)
Meat	598 (39.0)	937 (61.0)	139 (43.8)	178 (56.2)
Vegetables	205 (13.4)	1330 (86.6)	33 (10.4)	284 (89.6)
Potato chips	170 (11.1)	1365 (88.9)	21 (6.6)	296 (93.4)
Fries	308 (20.1)	1227 (79.9)	61 (19.2)	256 (80.8)
Do you think these are high or low in protein?
Chicken	309 (20.1)	1226 (79.9)	64 (20.2)	253 (79.8)
Cheese	821 (53.5)	714 (46.5)	162 (51.1)	155 (48.9)
Fruits	1035 (67.4)	500 (32.6)	162 (51.1)	155 (48.9)
Beans	479 (31.2)	1056 (68.8)	88 (27.8)	229 (72.2)
Butter	645 (42.0)	890 (58.0)	157 (49.5)	160 (50.5)
Eggs	205 (13.4)	1330 (86.6)	36 (11.4)	281 (88.6)
Do you think these are high or low in fibres?
Eggs	1170 (76.2)	365 (23.8)	147 (46.4)	170 (53.6)
Meat	1247 (81.2)	288 (18.8)	190 (59.9)	127 (40.1)
Broccoli	1122 (73.1)	413 (26.9)	102 (32.2)	215 (67.8)
Nuts	1367 (89.1)	168 (10.9)	230 (72.6)	87 (27.4)
Fish	1321 (86.1)	214 (13.9)	213 (67.2)	104 (32.8)
Beans	1194 (77.8)	341 (22.2)	133 (42.0)	184 (58.0)
Rice	1307 (85.1)	228 (14.9)	197 (62.1)	120 (37.9)
Bulgur	1251 (81.5)	284 (18.5)	168 (53.0)	149 (47.0)
True/False (T/F): Some foods contain a lot of fat, but no cholesterol	1188 (77.4)	347 (22.6)	212 (66.9)	105 (33.1)
T/F: Brown sugar is a healthy alternative to white sugar	1158 (75.4)	377 (24.6)	245 (77.3)	72 (22.7)
T/F: There is more protein in a glass of whole milk than in a glass of skimmed milk	1206 (78.6)	329 (21.4)	225 (71.0)	92 (29.0)
A type of oil which contains mostly unsaturated fatty acids is:	1213 (79.0)	322 (21.0)	180 (56.8)	137 (43.2)
Which of these breads contain the most vitamins and minerals?	865 (56.4)	670 (43.6)	143 (45.1)	174 (54.9)
T/F: There is more Calcium in a glass of whole milk than a glass of skimmed milk	1192 (77.7)	343 (22.3)	219 (69.1)	98 (30.9)
If a person wanted to reduce the amount of fat in their diet, which would be the best meat choice?	815 (53.1)	720 (46.9)	95 (30.0)	222 (70.0)
Which cheese would be the best choice as a lower fat option?	1242 (80.9)	293 (19.1)	185 (58.4)	132 (41.6)
What do you think will help prevent heart diseases?
Increasing fibre intake	715 (46.6)	820 (53.4)	107 (33.8)	210 (66.2)
Decreasing salt intake	362 (23.6)	1173 (76.4)	60 (18.9)	257 (81.1)
Increasing saturated fatty acid intake	441 (28.7)	1094 (71.3)	88 (27.8)	229 (72.2)
Are you aware that many chronic diseases (such as diabetes, heart diseases and certain types of cancer) are related to a low intake of fruits and vegetables?	895 (58.3)	640 (41.7)	154 (48.6)	163 (51.4)
Are you aware that smoking causes many chronic diseases (such as lung cancer and heart diseases)?	173 (11.3)	1362 (88.7)	19 (6.0)	298 (94.0)
T/F: True or false; Percentages are calculated according to the number of participants with non-missing values for each item

## Sheet: Table S2
Table S2. Responses to the Dietary Adherence Questionnaire of the adolescents and their parents
	Adolescents n (%)							Parents n (%)
	None		Once		Twice		≥3 times	None		Once		Twice		≥3 times
Yesterday, did you eat meat (like chopped meat in stews), chicken breast (not fried), or fish (not fried)?	827 (55.5)		827 (55.5)		61 (4.1)		10 (0.7)	99 (33.2)		176 (59.1)		18 (6.0)		5 (1.7)
Yesterday, did you eat fried chicken, chicken nuggets, fried fish, fried meat, hot dogs, sausage, mortadella, or ham?	896 (60.0)		506 (33.9)		76 (5.1)		16 (1.1)	224 (75.4)		68 (22.9)		5 (1.7)		0
Yesterday, did you eat chocolate cream or potato chips?	702 (46.9)		616 (41.2)		130 (8.7)		48 (3.2)	168 (56.6)		112 (37.7)		13 (4.4)		4 (1.3)
Yesterday, did you eat any of these foods? Labneh, shanklish, kareesha?	939 (62.9)		481 (32.2)		65 (4.4)		8 (0.5)	100 (33.8)		172 (58.1)		21 (7.1)		3 (1.0)
Yesterday, did you eat any of these cheeses? Mozzarella, feta, akawi, baladiye, khadra?	1249 (83.5)		219 (14.6)		21 (1.4)		6 (0.4)	189 (63.6)		96 (32.3)		10 (3.4)		2 (0.7)
Yesterday, did you eat any of these foods? Cheddar cheese, gruyere, edam, goat cheese, gouda, parmesan, Roquefort, kashkawan, cream cheese, kishk	977 (65.4)		434 (29.0)		71 (4.7)		13 (0.9)	217 (73.1)		75 (25.3)		3 (1.0)		2 (0.7)
Yesterday, did you drink milk or laban?	1177 (78.7)		276 (18.5)		38 (2.5)		4 (0.3)	128 (43.0)		155 (52.0)		13 (4.4)		2 (0.7)
Yesterday, did you drink skimmed milk (reduced or 0% fat) or skimmed laban?	1461 (97.9)		19 (1.3)		8 (0.5)		5 (0.3)	263 (88.3)		31 (10.4)		2 (0.7)		2 (0.7)
Yesterday, did you eat white Arabic bread, kaak, franjeh bread?	294 (19.7)		674 (45.2)		385 (25.8)		138 (9.3)	51 (17.1)		180 (60.2)		47 (15.7)		21 (7.0)
Yesterday, did you eat whole bread, oat bread, brown bread, tortillas?	1357 (90.9)		101 (6.8)		24 (1.6)		11 (0.7)	222 (74.2)		53 (17.7)		17 (5.7)		7 (2.3)
Yesterday, did you eat French fries (fried potatoes)?	917 (61.4)		528 (35.3)		39 (2.6)		10 (0.7)	175 (58.5)		114 (38.1)		7 (2.3)		3 (1.0)
Yesterday, did you eat beans like lentils, white beans, fava beans (do not count green beans)?	1281 (85.7)		191 (12.8)		20 (1.3)		3 (0.2)	184 (61.7)		106 (35.6)		7 (2.3)		1 (0.3)
Yesterday, did you eat any vegetables (do not count potatoes)?	563 (37.7)		774 (51.8)		116 (7.8)		42 (2.8)	52 (17.4)		196 (65.6)		43 (14.4)		8 (2.7)
Yesterday, did you eat fresh fruits? Do not count fruit juice and dried fruits	804 (53.1)		574 (37.9)		103 (6.8)		34 (2.2)	44 (14.5)		190 (62.7)		50 (16.5)		19 (6.3)
Yesterday, did you drink natural fruit juice?	1366 (90.3)		122 (8.1)		18 (1.2)		6 (0.4)	208 (68.6)		84 (27.7)		9 (3.0)		2 (0.7)
Yesterday, did you drink commercial fruit juice?	1021 (67.5)		436 (28.8)		44 (2.9)		11 (0.7)	227 (74.9)		67 (22.1)		4 (1.3)		5 (1.7)
Yesterday, did you drink soft drinks (Pepsi, 7up, Miranda, Sprite, Coca Cola, Fanta …)?	759 (50.1)		578 (38.2)		128 (8.5)		49 (3.2)	191 (63.0)		95 (31.4)		12 (4.0)		5 (1.7)
Yesterday, did you drink diet soft drinks (Pepsi diet, 7up diet, Coca Cola diet, …)?	1467 (97.2)		31 (2.1)		7 (0.5)		5 (0.3)	278 (92.1)		19 (6.3)		2 (0.7)		3 (1.0)
Yesterday, did you drink energy drinks (Red Bull, AMP, …)?	1397 (92.3)		98 (6.5)		9 (0.6)		9 (0.6)	282 (93.4)		19 (6.3)		0		1 (0.3)
Yesterday, did you eat any sweets such as sweet rolls, cookies, cakes, pies, brownies, cheesecake, doughnuts?	864 (57.1)		534 (35.3)		101 (6.7)		14 (0.9)	210 (69.5)		84 (27.8)		6 (2.0)		2 (0.7)
Yesterday, did you eat any Arabic sweets (namoura, knefeh, halewet el jibn, znood el sitt …)?	1382 (91.4)		116 (7.7)		11 (0.7)		3 (0.2)	226 (76.9)		61 (20.7)		6 (2.0)		1 (0.3)
	No			Yes				No			Yes
Yesterday, did you have breakfast?	630 (41.7)			880 (58.3)				52 (17.6)			244 (82.4)
	None	One meal		2 meals		≥3 meals		None	One meal		2 meals		≥3 meals
Yesterday, how many meals did you eat (meals include breakfast, lunch, and dinner)?	8 (0.5)	325 (21.5)		695 (46.0)		483 (32.0)		2 (0.7)	27 (9.2)		125 (42.5)		140 (47.6)
	None	One snack		2 snacks		≥3 snacks		None	One snack		2 snacks		≥3 snacks
Yesterday, did you have a snack? A snack is a food or drink (except for water) that you eat or drink between meals.	292 (19.5)	650 (43.3)		448 (29.9)		110 (7.3)		113 (38.6)	103 (35.2)		57 (19.5)		20 (6.8)
	None	One meal		2 meals		≥3 meals		None	One meal		2 meals		≥3 meals
Yesterday, how many times did you eat food from outside of your house? (restaurants, fast food restaurants, pizza places and cafeterias)	1199 (79.5)	270 (17.9)		29 (1.9)		10 (0.7)		254 (85.8)	30 (10.1)		9 (3.0)		3 (1.0)
	No			Yes				No			Yes
Do you participate in physical education sessions at school/regularly?	290 (19.5)			1199 (80.5)				208 (70.3)			88 (29.7)
Do you participate in any sports activity (other than physical education session at schools)?	887 (59.6)			602 (40.4)
	0 h	1 h		2-4 h		≥5 h		0 h	1 h		2-4h		≥5 h
How many hours per week do you exercise?	257 (17.3)	599 (40.4)		412 (27.8)		214 (14.4)		142 (48.0)	75 (25.3)		59 (19.9)		20 (6.8)
	0 h	1 h	2 h	3 h	4 h	5 h	≥6 h	0 h	1 h	2 h	3 h	4 h	5 h	≥6 h
How many hours per day do you usually spend playing video games, watching TV, using tablets and chatting on the phone?	57 (4.1)	179 (12.7)	244 (17.4)	219 (15.6)	178 (12.7)	155 (11.0)	374 (26.6)	18 (6.1)	62 (21.0)	87 (29.5)	53 (18.0)	33 (11.2)	18 (6.1)	24 (8.1)
	No		Yes			Stopped smoking		No		Yes			Stopped smoking
Do you smoke? (cigarettes and narjileh are included)	1156 (78.0)		289 (19.5)			37 (2.5)		162 (55.3)		121 (41.3)			10 (3.4)
Note: Percentages are calculated according to the number of participants with non-missing values for each item

## Sheet: Table S3
Table S3. Between group comparisons of the healthy items and unhealthy items scores of the adolescents and their parents
	Adolescents				Parents
	Mean Total Healthy Items Score (SD)	p Value	Mean Total Unhealthy Items Score (SD)	p Value	Mean Total Healthy Items Score (SD)	p Value	Mean Total Unhealthy Items Score (SD)	p Value
Mean	8.83 (3.64)	-	6.37 (3.19)	-	10.21 (3.31)	-	4.87 (2.59)	-
Gender
Male	9.65 (3.74)	<0.01	7.29 (3.38)	<0.01	11.04 (3.20)	0.01	5.30 (2.77)	0.11
Female	8.42 (3.51)		5.92 (2.99)		9.93 (3.27)		4.71 (2.54)
Age/class
Grade 10	9.05 (3.58)	0.02	6.41 (3.20)	0.57	10.29 (3.25)	0.61	4.73 (2.28)	0.28
Grade 11	8.57 (3.70)		6.31 (3.19)		10.08 (3.42)		5.07 (2.96)
Type of school
Public	8.88 (3.56)	0.35	6.24 (3.12)	0.01	10.16 (3.21)	0.42	4.81 (2.42)	0.47
Private	8.68 (3.83)		6.72 (3.34)		10.72 (4.26)		5.38 (3.88)
Location
Urban	7.53 (3.12)	<0.01	6.03 (2.86)	<0.01	10.01 (3.26)	0.31	4.50 (2.48)	0.02
Rural	9.51 (3.71)		6.55 (3.34)		10.41 (3.36)		5.22 (2.65)
Beirut (U)	7.53 (3.12)	<0.01	6.03 (2.86)	<0.01	10.01 (3.26)	0.2	4.50 (2.48)	0.02
Baalbeck (R)	9.26 (3.53)		6.40 (3.15)		10.18 (3.11)		5.06 (2.40)
Rayak (R)	10.46 (4.20)		7.14 (3.95)		11.15 (4.06)		5.76 (3.35)
Abbreviations: U: Urban; R: Rural; SD: Standard deviation

## Sheet: Table S4
Table S4. Between group comparison of separate Dietary Adherence Questionnaire (DAQ) items according to demographic characteristics
	Adolescents				Parents
DAQ items	Gender	Grade	Type of school	Location	Gender	Grade	Type of school	Location
Lean meat	Boys ***		Public *	Rural ***
High fat meat			Private ***	Urban ***
Unhealthy snacks			Public ***	Rural ***				Rural ***
Low fat dairy	Boys **			Rural ***
Medium fat dairy							Pubic *
High fat dairy	Boys **		Private ***					Rural **
Whole milk				Rural ***				Rural *
Skimmed milk			Private **	Rural ***
Refined bread	Boys ***			Rural ***
Whole bread				Rural *
French fries	Boys ***			Rural *
Beans				Rural **
Vegetables			Public *	Rural ***
Fruits				Rural ***				Rural **
Natural juices	Boys *			Rural ***
Commercial juices	Boys *		Private ***
Soft drinks	Boys ***			Rural **	Men *
Diet soft drinks				Rural *
Energy drinks	Boys *	Grade 10 *		Rural ***
Sweets			Private ***
Arabic sweets			Public ***	Rural ***
Breakfast			Public **	Rural ***		Grade 10 *		Rural *
Number of meals	Boys ***			Rural ***
Numbers of snacks	Boys **		Private ***	Urban ***			Private *
Number of meals outside the house	Boys ***
PA practiced at school/ regularly		Grade 10 ***	Public ***	Urban ***	Men **			Urban *
PA practiced outside of the school	Boys ***		Private **
Number of PA hours practiced per week	Boys ***	Grade 10 *			Men *
Screen viewing time	Girls ***			Urban *			Private *
Smoking	Boys **
Note: Only significant differences are reported in the table above. Abbreviations: PA: Physical activity; *: p<0.05; **: p<0.01; ***: p<0.001 (Using independent t-test)

## Sheet: Table S5
Table S5: Pearson's correlations between the DAQ items of adolescents.
	Lean meat consumption	Unhealthy snack consumption	Low fat dairy consumption	Medium fat dairy consumption	High fat dairy consumption	Whole milk consumption	Skimmed milk consumption	Refined bread consumption	Whole bread consumption	French fries consumption	Beans consumption	Vegetables consumption	Fruits consumption	Natural juices consumption	Commercial juices consumption	Soft drinks consumption	Diet coke consumption	Energy drink consumption	Sweets consumption	Arabic sweets consumption	Breakfast consumption	Number of meals consumed	Number of snacks consumed	Number of meals consumed outside of the house	PA practiced at school	PA practiced outside of the school	Number of hours of PA practice per week	Screenviewing time	Smoking
Lean meat consumption		0.051*	0.053*	0.085**	-0.077**	0.151***	0.127***	-0.009	0.057*	-0.082**	0.056*	0.087**	0.056*	0.081**	0.051*	0.064*	0.047	0.03	-0.002	0.113***	0.126***	0.181***	-0.038	-0.018	0.021	0.054*	0.046	-0.028	-0.010
High fat meat consumption	-0.286***	0.056*	-0.00345306	0.033477	0.137***	-0.0209905	0.097***	0.179***	0.0384109	0.353***	-0.051*	-0.017237	-0.0215784	0.0449814	0.126***	0.223***	0.0470223	0.053*	0.085**	0.00605262	-0.088**	0.0422282	0.127***	0.204***	-0.00192462	0.0372089	0.0330068	0.074**	0.071**
Unhealthy snack consumption			0.0443016	0.093***	0.0221908	0.057*	0.095***	0.0144624	0.090***	0.167***	0.0345	0.0496794	0.113***	0.143***	0.169***	0.292***	0.078**	0.198***	0.148***	0.154***	0.0380266	0.083**	0.128***	0.108***	0.0198117	0.0161676	0.0162875	0.0240049	0.057*
Low fat dairy consumption				0.150***	0.0149998	0.106***	0.127***	0.320***	0.134***	-0.0204497	0.122***	0.136***	0.139***	0.122***	0.00938042	0.0109618	0.105***	0.091***	0.057*	0.095***	0.266***	0.307***	0.0249861	-0.0446481	0.0453625	0.093***	0.090**	-0.087**	-0.0331323
Medium fat dairy consumption					0.0266511	0.169***	0.187***	0.102***	0.160***	-0.00452136	0.0505206	0.074**	0.108***	0.172***	0.0146096	0.033885	0.230***	0.095***	0.064*	0.154***	0.117***	0.114***	-0.056*	0.00042284	0.0124476	0.0410319	0.0216415	-0.0398532	-0.0207511
High fat dairy consumption						0.00483704	0.100***	0.125***	0.0329605	0.0473506	0.060*	-0.0461531	0.0287935	0.0206732	0.080**	0.063*	0.055*	0.069**	0.081**	0.0466501	0.077**	0.135**	0.099***	0.086**	-0.051*	0.00685103	-0.0176406	0.0232593	0.055*
Whole milk consumption							0.292***	0.0212722	0.068**	-0.0173384	0.124***	0.081**	0.185***	0.224***	-0.0159942	-0.0423377	0.150***	0.084**	0.083**	0.149***	0.163***	0.180***	-0.0145598	-0.0211713	0.0170456	0.061*	0.075**	-0.088**	-0.058*
Skimmed milk consumption								0.0181478	0.279***	0.0282057	0.153***	0.146***	0.107***	0.290***	0.0299402	0.077**	0.306***	0.207***	0.090***	0.113***	0.0376059	0.0265749	-0.0156059	0.065*	-0.0293147	0.0153259	0.00943687	-0.074**	0.00397865
Refined bread consumption									-0.123***	0.221***	0.0507372	0.143***	0.099***	0.055*	0.091***	0.110***	0.016144	0.0398783	0.088***	0.0401541	0.258***	0.400***	0.055*	0.058*	0.0135596	0.024152	0.0406035	-0.0450111	-0.0127326
Whole bread consumption										0.00887164	0.090**	0.133***	0.147***	0.141***	0.0261762	0.0377215	0.256***	0.085**	0.0130275	0.167***	0.052*	0.052*	-0.00213751	0.0089466	0.0251093	0.0177211	0.0192108	-0.0200442	0.0414562
French fries consumption											-0.0419789	0.054*	0.0441879	0.081**	0.112***	0.363***	0.031021	0.131***	0.0443739	0.110***	0.00725367	0.071**	0.0363007	0.224***	0.00857162	0.0190882	0.0191397	0.064*	0.0294388
Beans consumption												0.0411826	0.020971	0.089**	0.057*	-0.066*	0.138**	0.082**	0.052*	0.111***	0.109***	0.083**	-0.011504	-0.0106314	0.0205626	-0.00517979	0.0214662	-0.0445888	0.0141236
Vegetables consumption													0.192**	0.179***	0.00739615	0.026974	0.114***	0.0384868	-0.00892715	0.136***	0.146***	0.197***	-0.000659697	-0.0170846	0.057*	0.0310667	0.064*	-0.0419457	-0.0254093
Fruits consumption														0.243**	0.0347873	-0.00101354	0.089**	0.055*	0.0215571	0.151***	0.162***	0.158***	0.131***	-0.0479704	0.00211435	0.126***	0.133***	-0.072**	-0.068**
Natural juices consumption															0.054*	0.0359215	0.206***	0.124***	0.130***	0.325***	0.066**	0.0450936	0.0503892	0.0449283	0.0446919	0.101***	0.104***	-0.0515974	0.0319159
Commercial juices consumption																0.112***	0.116***	0.195***	0.178***	0.101***	-0.079**	-0.00913913	0.222***	0.087**	-0.056*	-0.0141181	-0.0464036	0.058*	0.070**
Soft drinks consumption																	0.084**	0.224***	0.070**	0.097***	-0.0311484	0.0501783	0.093***	0.225***	-0.00335219	0.0503408	0.054*	0.098***	0.108***
Diet coke consumption																		0.203***	0.123***	0.167***	-0.0203428	-0.054*	-0.018329	0.074**	-0.00462361	0.0245848	-0.00722167	0.00649947	0.0358437
Energy drink consumption																			0.107***	0.158***	0.0181209	0.0266085	0.137***	0.117***	0.0104931	0.0355918	0.044049	0.068*	0.134***
Sweets consumption																				0.076**	-0.0291904	-0.012978	0.327***	0.108***	-0.0212875	-0.0297245	-0.0388932	0.0392536	-0.003226
Arabic sweets consumption																					0.062*	0.076**	0.0305679	0.086**	0.0435045	0.0385327	0.058*	-0.0440055	-0.0193069
Breakfast consumption																						0.644***	-0.196***	0.0122201	0.0209346	0.0395959	0.0338618	-0.077**	-0.0155473
Number of meals consumed																							-0.096**	0.0439873	0.036878	0.065*	0.115***	-0.062*	-0.0484549
Number of snacks consumed																								0.095***	-0.068**	0.0300793	0.00107421	0.101***	0.049928
Number of meals consumed outside of the house																									-0.0149686	0.0266977	0.023603	0.0297567	0.111***
PA practiced at school																										0.250***	0.532***	-0.067*	-0.0316048
PA practiced outside of the school																											0.715***	-0.073**	-0.00588167
Number of hours of PA practice per week																												-0.102***	-0.0259388
Screenviewing time																													0.138***
Note: * p<0.05; ** p<0.01; *** p<0.001. Abbreviations: PA: Physical activity

## Sheet: Table S6
Table S6: Pearson's correlations between the DAQ items of adolescents, the DAQ items of the parents, the total knowledge score of adolescents, and the BMI z-score.
	Lean meat consumption - adolescents	High fat meat consumption - adolescents	Unhealthy snack consumption - adolescents	Low fat dairy consumption - adolescents	Medium fat dairy consumption - adolescents	High fat dairy consumption - adolescents	Whole milk consumption - adolescents	Skimmed milk consumption - adolescents	Refined bread consumption - adolescents	Whole bread consumption - adolescents	French fries consumption - adolescents	Beans consumption - adolescents	Vegetables consumption - adolescents	Fruits consumption - adolescents	Natural juices consumption - adolescents	Commercial juices consumption - adolescents	Soft drinks consumption - adolescents	Diet coke consumption - adolescents	Energy drink consumption - adolescents	Sweets consumption - adolescents	Arabic sweets consumption - adolescents	Breakfast consumption - adolescents	Number of meals consumed - adolescents	Number of snacks consumed - adolescents	Number of meals consumed outside of the house - adolescents	PA practiced at school - adolescents	PA practiced outside of the school - adolescents	Number of hours of PA practice per week - adolescents	Screenviewing time - adolescents	Smoking - adolescents
Total Knowledge score - Adolescents	0.0162158	-0.02828	-0.073**	0.0220125	0.067**	-0.055*	0.057*	-0.00439335	0.0159406	0.0199717	-0.071**	0.000102597	0.0329087	0.077**	-0.0377656	-0.0477433	-0.108**	-0.0224099	-0.070**	-0.078**	-0.079**	0.095**	0.059*	-0.0205839	-0.076**	0.004749	0.098**	0.056*	-0.077**	-0.07**
BMI z score	-0.0307035	0.00864171	-0.073**	-0.0221924	-0.0273966	-0.0230027	-0.056*	-0.0207299	-0.097**	0.00028283	-0.071**	-0.0498323	-0.0360732	-0.062*	-0.0480042	-0.0298817	-0.0442858	-0.027035	0.0388216	-0.0181279	-0.089**	-0.085**	-0.144**	0.070**	-0.0224166	-0.0436645	-0.0296834	-0.0445766	-0.000889998	0.0224255
Lean meat consumption - parents	0.114*	-0.0879908	0.00344552	0.0113742	0.123*	-0.0805408	0.0258553	0.0219364	0.0639459	-0.0220932	0.00346071	0.0492205	0.115*	0.134*	-0.035284	-0.0246098	0.03852	0.0743091	-0.0082858	0.0664465	-0.0181297	0.0304705	0.0568411	0.0142429	-0.0130572	-0.00555212	0.029529	0.0330445	-0.0143705	-0.0321696
High fat meat consumption - parents	-0.0370332	0.180**	0.0394865	0.0333504	0.0782016	-0.0358665	-0.0761352	-0.0322668	0.0770221	0.0380096	0.0512627	-0.0814329	-0.0436236	0.0534653	-0.0667319	0.0442734	0.0757706	0.117*	0.0243919	0.0124987	-0.00737677	-0.0650969	-0.143	0.087819	0.0654313	-0.0495096	-0.0418535	-0.0534983	-0.003145	0.0676802
Unhealthy snacks consumption - parents	0.00455678	0.0464826	0.0857902	0.150**	-0.0400162	0.0431903	-0.00989484	0.135*	0.0816991	-0.0230795	0.0446698	0.100133	0.0658269	0.0399903	0.0133247	-0.0486568	0.182**	0.122*	0.192**	-0.0280463	-0.0397039	0.0912586	-0.010885	-0.0131134	0.0989443	-0.0132247	0.0680359	0.0402665	0.0416137	0.053699
Low fat dairy products consumption - parents	0.101436	-0.108917	-0.016855	0.160**	-0.0307542	-0.0605006	0.086445	0.118*	0.01802	-0.078428	-0.0184608	0.0662476	0.0291868	0.0305128	0.076686	0.0220816	0.0136574	0.0217402	-0.00921248	0.0247306	0.000671371	-0.0382544	-0.0296182	0.00894005	-0.00553946	-0.0450291	0.110327	0.0694913	-0.10341	-0.0251796
Medium fat dairy products consumption - parents	0.0249228	-0.0447544	0.0636855	0.0332824	0.0514873	0.00357447	0.0416939	0.0581123	0.0608506	-0.0176406	-0.06245	0.00545743	0.0302084	0.0106672	-0.0391598	-0.0297082	0.00620351	0.0934956	-0.0160002	-0.0839087	-0.066212	-0.0579357	-0.0455345	-0.0148024	0.0348221	0.00774599	0.0173112	0.0453927	-0.0279655	-0.0308983
High fat dairy products consumption - parents	0.068433	-0.0611512	0.0486589	0.141*	0.00394198	0.0301731	0.10019	0.305**	0.0194426	0.0199972	0.012335	0.0596532	0.130*	0.0512431	0.202**	0.0454135	0.0807984	0.204**	0.172**	-0.0217113	0.0513172	0.0271721	-0.000361038	-0.0374526	0.0227717	-0.0413355	0.0153434	0.0218021	-0.0440876	-0.0559677
Whole milk consumption - parents	0.0572205	0.0439318	-0.0429736	0.0959059	0.138*	0.0170576	-0.0282169	-0.0605877	0.0420351	0.0528738	0.00679017	-0.0257405	0.138*	0.0337132	0.0244961	0.00740701	-0.0103044	-0.0695084	-0.116	-0.0173035	0.0933872	0.162**	0.189**	-0.00413757	-0.00112074	0.0155877	0.119*	0.113686	0.0308734	-0.0745436
Skimmed milk consumption - parents	0.0362848	0.0588347	-0.0530261	0.0931012	0.00986933	0.00329057	0.0987326	0.120*	0.00282672	-0.0844048	0.033978	-0.0417594	0.0484523	0.0561627	0.0737115	0.114*	0.0620398	0.0436976	0.0391657	0.0943025	0.0360696	0.0254413	0.0223484	0.0454337	-0.0183557	-0.0816938	0.0336233	0.0142582	0.094585	-0.0554932
Refined bread consumption - parents	0.0199667	-0.100512	-0.0775282	0.148*	-0.0585846	0.0659961	0.0520017	0.141*	0.106973	0.0560988	0.0304306	0.0173392	0.0619181	0.106979	0.104724	0.0308423	-0.0231458	0.117*	0.0560893	0.0137869	0.0991221	0.0675498	0.029618	0.0381302	-0.00244822	-0.0111115	0.0188409	-0.0151167	-0.027114	0.0708701
Whole bread consumption - parents	0.0870727	0.104154	0.0107226	0.0776761	0.0944481	-0.0816258	0.146*	0.136*	0.171**	0.0434433	0.0287809	0.0378176	0.141*	-0.0280519	0.0787015	0.00326584	0.057913	-0.0137743	0.0185937	0.0342462	0.0405165	0.0167424	0.131*	0.000489937	0.0450731	0.0896558	-0.0922071	0.0192598	-0.0164857	-0.161
Fries consumption - parents	-0.0839896	0.0248649	0.130*	0.0920814	0.016816	0.00565943	-0.0501792	0.248**	0.132*	0.0107593	0.167**	0.0273129	-0.0201419	-0.0363157	0.0817984	0.0958802	0.129*	0.0530236	0.205**	0.109631	-0.0324134	-0.121	-0.135	0.108123	0.195**	-0.0599439	-0.0287079	-0.00654956	0.120*	0.0215471
Beans consumption - parents	0.0805589	-0.0743379	-0.0171908	0.118*	0.0247367	-0.0397303	0.0284825	0.166**	0.0844858	-0.0533105	0.0418121	0.140*	0.0746551	-0.059326	0.0927057	-0.0563288	-0.0184131	0.0353668	0.110679	0.0528124	0.0720266	-0.063232	0.0188656	-0.0205802	0.0799795	-0.0312128	-0.0911197	-0.0725341	-0.0572375	-0.00732974
Vegetables consumption - parents	0.0542857	-0.067374	-0.0242722	0.0996786	-0.0274158	-0.0859016	-0.017676	-0.0910395	0.161**	0.105295	0.0194675	-0.108224	0.161**	0.0877869	0.0194371	-0.0317527	0.0122282	-0.0314257	-0.117	-0.030231	-0.0273737	0.053409	0.0475501	-0.00518278	-0.0779105	-0.0180207	0.0431903	0.0418286	-0.0883484	-0.0982403
Fruits consumption - parents	0.0640249	-0.105858	0.00385154	0.0509801	0.0206753	-0.0304081	0.0396733	0.0668713	0.108901	0.0382761	0.0253413	-0.0317641	0.206**	0.166**	0.04979	-0.0291976	-0.00952718	-0.0480555	-0.0284868	-0.0625493	-0.00112447	0.089474	0.0777473	0.00605767	-0.0604013	-0.0533349	0.0545394	0.0515677	0.0186354	-0.0261137
Natural juice consumption - parents	0.01877	0.0678763	0.0548948	0.0145624	0.00359895	0.0477372	-0.0349957	0.0644689	0.0172686	-0.0102037	0.0831695	-0.0824007	0.0234216	0.0216327	0.115*	-0.0272244	0.134*	0.0453826	0.08606	-0.0307153	0.0303147	-0.0953593	-0.0962279	0.131*	0.151**	-0.0979472	0.0688978	0.027888	0.0753675	0.0206523
Commercial juices consumption - parents	0.00798316	-0.0381508	0.0611813	0.00452869	-0.0976378	-0.0912327	-0.00837612	-0.0295165	0.0520265	-0.0483226	0.0123581	0.0207861	-0.0188072	-0.0789973	-0.00348574	0.0399569	0.119*	-0.00211209	-0.0330512	0.107388	-0.0453856	-0.0206303	-0.0286022	0.0420903	0.0122268	-0.0893665	0.0496802	0.0169164	0.0904346	0.0780999
Soft drinks consumption - parents	-0.0404264	0.0518618	0.0826019	0.0756761	-0.0772215	0.0624667	-0.0123647	0.0490549	0.150**	-0.0150774	0.175**	0.0595168	-0.10687	0.0562296	-0.0204277	0.056271	0.293**	0.0236955	0.100264	0.0534417	-0.0791274	0.0157931	0.00687352	-0.00649829	0.0774503	0.0225714	0.0492544	0.0876045	-0.000865588	0.0194563
Diet soft drinks consumption - parents	0.0588746	-0.00312841	0.137*	0.149**	-0.016443	0.0258486	0.0617526	0.407**	0.0806043	0.00702135	0.0263734	0.0887717	0.0863459	0.0357271	0.165**	0.130*	0.176**	0.224**	0.259**	0.153**	-0.00695636	-0.122	-0.0536477	0.122*	0.109874	-0.112731	0.0548593	0.026259	0.00284332	-0.0445638
Energy drinks consumption - parents	0.0217554	0.0305764	0.130*	0.191**	-0.0534151	0.056731	0.166**	0.571**	0.141*	0.0344483	0.0428128	0.138*	0.150**	0.0272554	0.325**	0.122*	0.0992085	0.324**	0.423**	0.0312622	-0.0216716	0.044553	0.0522414	0.0640352	0.0891481	-0.101107	0.0135354	-0.0142639	-0.0274461	0.0649975
Sweets consumption - parents	0.0106268	-0.071801	0.0532734	0.0770035	-0.0214548	0.0162997	-0.00294786	-0.0353519	-0.0363791	0.0720123	-0.0380566	0.0291543	0.0359502	-0.0207868	-0.00626601	-0.0451448	0.0730916	0.0204869	-0.00852422	0.120*	-0.00151277	0.00956417	0.0437359	0.093574	-0.0625239	-0.0240953	-0.0442348	-0.0255335	0.036183	0.00334982
Arabic sweets consumption - parents	0.0520723	0.0125508	0.0963097	0.0495035	-0.00995937	0.140*	-0.0823858	0.0866924	0.00419303	-0.030693	0.0297221	0.0477209	-0.102834	0.0527773	0.0168367	-0.00833312	0.0799937	0.0779165	0.0984204	-0.0279434	0.0385932	0.00535357	-0.0146405	-0.0268237	0.00922396	0.0411291	0.0569446	0.0400248	0.0431403	0.031239
Breakfast consumption - parents	-0.0378941	-0.0412496	0.0200223	0.127*	0.0932146	0.111361	0.0163618	0.0270807	0.168**	-0.00960517	-0.0124182	0.0181478	0.0650472	0.0937435	0.0993437	-0.147	-0.0170382	0.057496	-0.114095	-0.0476717	0.0540522	0.212**	0.204**	-0.0458958	-0.0291388	0.134*	0.0361791	0.105765	-0.10327	-0.125
Number of meals consumed - parents	-0.0214659	-0.0289875	0.0163581	0.107356	0.125*	0.112808	-0.0258396	-0.119	0.162**	0.00619846	-0.0342288	-0.0648439	0.0595505	0.0772862	-0.00834898	-0.0363649	-0.0329837	-0.0154577	-0.0713553	0.0288679	0.0219705	0.0923659	0.158**	0.0895272	-0.0402607	0.0794835	0.0411422	0.101819	-0.0167672	-0.0972528
Number of snacks consumed - parents	0.123*	0.0518619	-0.056703	0.120*	0.041914	-0.067793	0.0528071	0.130*	0.161**	-0.0473202	0.0310943	-0.0552585	0.191**	0.202**	0.10859	-0.0357716	-0.0187437	0.0262441	0.0653794	-0.0326941	-0.0513094	0.0404933	0.100469	0.102917	0.0998133	-0.116	-0.0747649	-0.0549201	0.0197223	-0.0100018
Number of meals consumed outside of the house - parents	0.022258	0.0631496	0.0921655	0.0876158	-0.0658479	-0.0593628	0.107494	0.311**	0.084478	-0.0370381	0.0673106	0.159**	0.0157462	-0.0303402	0.173**	0.0622328	0.0808434	0.0551375	0.211**	0.0912929	0.0439471	-0.0985377	-0.0698427	0.118*	0.0237018	-0.0268501	0.0726824	0.0747473	-0.000162043	-0.0509421
Regular PA practice - parents	-0.041994	0.00874895	0.0809225	-0.0184052	-0.0153395	0.022343	-0.0562915	0.0893837	0.0515355	-0.0149977	0.0724253	0.0353683	0.0578787	0.0639843	0.158**	0.0962234	-0.00420879	-0.0423766	0.0342929	0.0700002	0.0975753	-0.0566214	-0.0506427	0.0927717	0.0984171	0.0375523	0.136*	0.144*	-0.108082	-0.0585969
Number of PA hours practiced in a week	0.0131003	-0.00738508	-0.0296264	0.053787	-0.00900528	0.00660112	-0.0317548	0.130*	0.0909567	-0.00994191	0.123*	0.0604404	0.117*	0.0890101	0.130*	0.04275	-0.00647037	0.000874961	0.0600783	-0.048129	0.026733	0.0666668	0.0842717	0.00674899	0.102132	0.0853286	0.144*	0.195**	-0.0772637	-0.0715629
Screen viewing hours per day - parents	-0.00822139	0.0769381	0.0282634	0.113448	0.152**	-0.0485626	0.0658206	0.124*	0.152**	-0.0120917	0.132*	-0.000529433	0.0582885	-0.0105384	0.116*	-0.061332	0.0548153	-0.055928	0.04389	0.0476276	-0.0840576	-0.00232259	0.104255	0.0313051	0.0695992	-0.0745627	-0.00546973	0.00255897	0.276**	0.0430069
Smoking - parents	-0.0427255	0.102483	0.0141371	-0.0541191	0.0626167	0.00321325	0.11245	-0.0504173	-0.0100667	0.0399692	-0.00614902	0.0580661	-0.116	-0.0713218	0.0422894	0.1016	0.057948	0.0823205	0.0382266	-0.0579711	-0.0466257	0.0429643	0.0345904	-0.0217778	-0.0734047	-0.0275861	-0.118	-0.0812374	0.166**	0.246**
Note: * p<0.05; ** p<0.01. Abbreviations: PA: Physical activity
